# Supplementary material
Source: Springer Nature journal article supplement (https://www.springermedizin.de/resource/supplementary/12967_2013_1759_MOESM11_ESM.pdf/9575252)

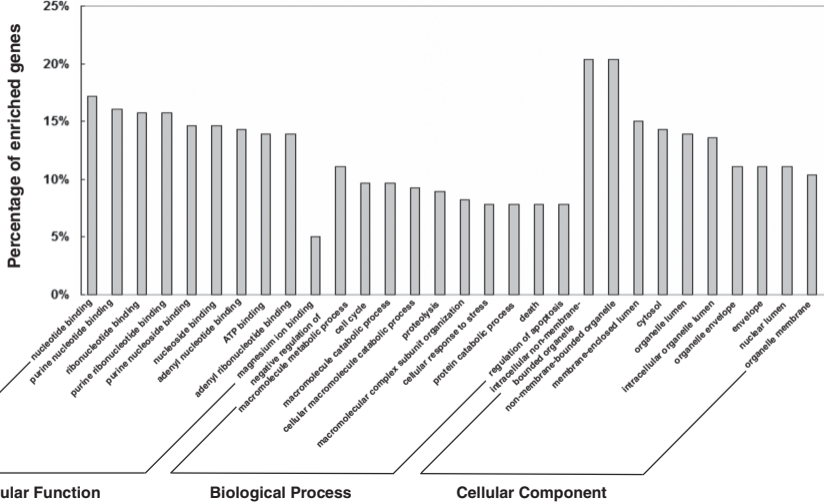

Supplement: MOESM11 [file 9575252]
